# Supplementary material
Source: MDPI journal article supplement (https://www.mdpi.com/2504-3129/2/3/21)
Supplement: s1 [file s1]

# Selecting Biomonitors of Atmospheric Nitrogen Deposition: Guidelines for Practitioners and Decision Makers

D. Nayeli Martínez <sup>1,2</sup>, Edison A. Díaz-Álvarez <sup>3</sup> and Erick de la Barrera <sup>2,\*</sup>

<sup>1</sup> Posgrado en Ciencias Biológicas, Universidad Nacional Autónoma de México, 04510 Mexico City, Mexico; dnmartinez@iies.unam.mx

<sup>2</sup> Instituto de Investigaciones en Ecosistemas y Sustentabilidad, Universidad Nacional Autónoma de México, Morelia, 58190 Michoacán, Mexico

<sup>3</sup> Instituto de Investigaciones Forestales, Universidad Veracruzana, Xalapa, 91070 Veracruz, Mexico; edisondiaz@uv.mx

\* Correspondence: delabarrera@unam.mx; Tel.: +52-(443)-322-3810

**Abstract:** Environmental pollution is a major threat to public health and is the cause of important economic losses worldwide. Atmospheric nitrogen deposition is one of the most significant components of environmental pollution, which, in addition to being a health risk, is one of the leading drivers of global biodiversity loss. However, monitoring pollution is not possible in many regions of the world because the instrumentation, deployment, operation, and maintenance of automated systems is onerous. An affordable alternative is the use of biomonitors, naturally occurring or transplanted organisms that respond to environmental pollution with a consistent and measurable ecophysiological response. This policy brief advocates for the use of biomonitors of atmospheric nitrogen deposition. Descriptions of the biological and monitoring particularities of commonly utilized biomonitor lichens, bryophytes, vascular epiphytes, herbs, and woody plants, are followed by a discussion of the principal ecophysiological parameters that have been shown to respond to the different nitrogen emissions and their rate of deposition.

**Keywords:** atmospheric pollution; environmental management; epiphytes; grasses; mosses; planetary boundaries; policy; public health.

## 1. A systematic literature review of biomonitors of nitrogen deposition

The biomonitoring synthesis from the main text was conducted from a systematic literature review based on searches in the Scopus database (Elsevier, Amsterdam) complemented with relevant articles identified as relevant from the authors' collective experience (Figure S1). We searched for papers containing the phrases "biomonitor(s)", "nitrogen deposition", and "nitrogen/NO<sub>x</sub>/ammonium/ammonia emissions". We focused on works that evaluated physiological traits of autotrophic organisms in response to Nitrogen emissions and deposition. Papers dealing primarily with population biology were excluded, as well as those focusing on types of pollution including aquatic pollution and heavy metals.

We identified 63 articles that utilized the physiological responses of autotrophic organisms with potential for biomonitoring nitrogen deposition (Figure S2; Table S1). While bryophytes were the most utilized lifeform for biomonitoring (26 studies), biomonitoring has also been conducted with lichens (mostly utilized as bioindicators), ferns, vascular epiphytes (especially two species in the neotropical genus *Tillandsia*), herbs, and woody plants (Figure S2a). The studies considered a combined total of 247 biomonitoring species, the most numerous being woody plants (Figure S2b).

Most of the articles reported were field studies, while only 10% were conducted under controlled environmental conditions, usually to calibrate plant responses to (simulated) nitrogen pollution. The parameters that were most sensitive to nitrogen deposition included the nitrogen elemental and isotopic status of biomonitors, photosynthesis indicators (chlorophyll and accessory pigment concentration and chlorophyll fluorescence), the activity of enzymes related to the nitrogen metabolism and with oxidative stress protection (Table S1).

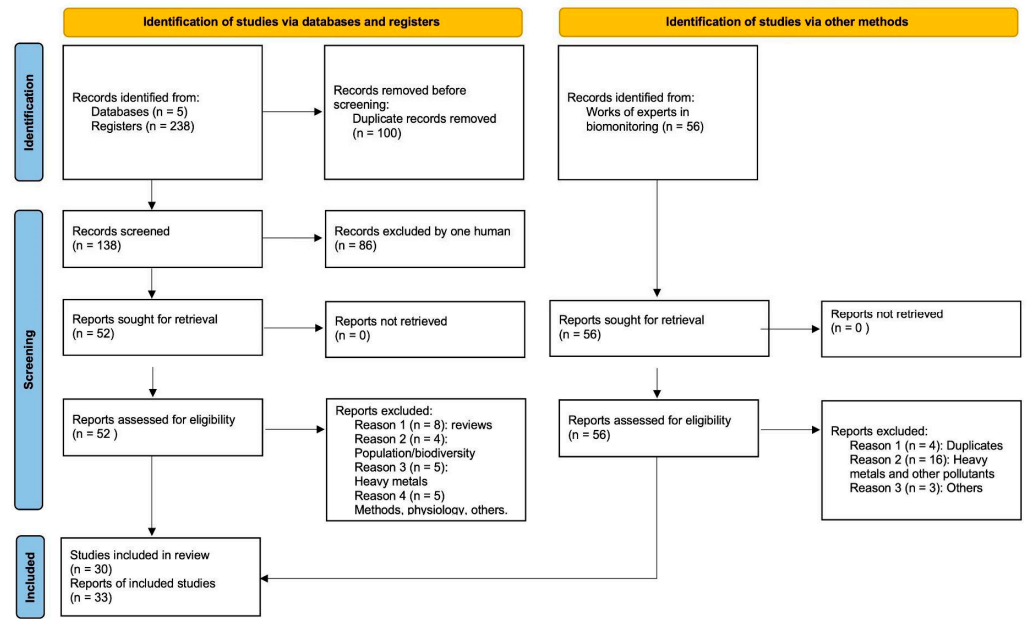

**Figure S1.** PRISMA [90] flow diagram for the systematic literature review conducted for biomoni-tors of nitrogen deposition.

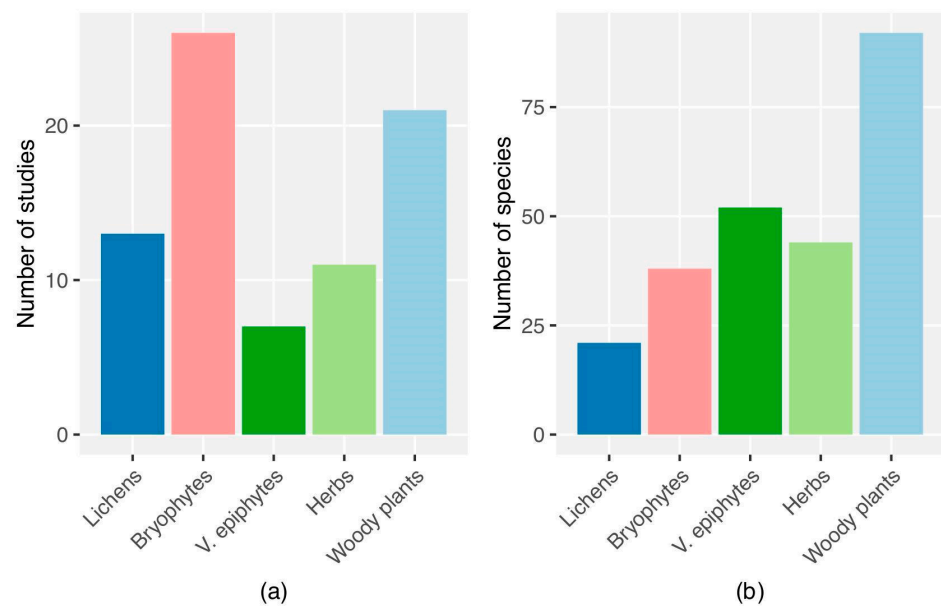

**Figure S2.** Number of studies identified in the literature review that utilized different biomonitor lifeforms **(a)** and total number of species per lifeform reported in the literature **(b)**.

**Table S1.** Biomonitoring of nitrogen deposition identified in the systematic literature review. Species and physiological traits analyzed under pollution gradients (field) or under with controlled environmental conditions of N pollution (Ctrl. cond.). N%, N elemental content; N/P and C/N, ratios of nitrogen with phosphorus and carbon; Protein, protein content; a.a, amino acids; Chl *T*, total chlorophylls; Chl *a/b*, ratio chlorophyll *a/b*; Neo+Lut/ $\beta$ -Car, neoxanthin + lutein/ $\beta$ -carotene;  $F_v/F_m$ , Fluorescence of chlorophyll *a*;  $\Phi_{PSII}$ , quantum efficiency of photosystem II;  $NQP_{max}$ , non-photochemical quenching; K, content of potassium; MDA, malondialdehyde; NR, nitrate reductase activity; NiR, nitrite reductase activity; GS, glutamine synthetase activity; PME, phosphomonoesterase activity; SOD, superoxide dismutase activity; POD, peroxidase activity; PPO, polyphenol oxidase activity; DHA, dehydrogenase activity. Reference numbers correspond to those in the main text.

| Liveform | Species                          | Biomass | Chlorophylls                      | Enzymes | Isotopes       | Study       | Site of study         | Reference |
|----------|----------------------------------|---------|-----------------------------------|---------|----------------|-------------|-----------------------|-----------|
| Lichens  | <i>Alectoria sarmentosa</i>      | N%, N/P |                                   |         |                | Ctrl. Cond. | Sweden                | [91]      |
|          | <i>Anaptychia</i> sp             | N%, C/N |                                   |         | $\delta^{15}N$ | Field       | Valley of Mexico      | [92]      |
|          | <i>Cladonia mitis</i>            | N%, C/N |                                   |         |                | Field       | Fort McMurray, Canada | [69]      |
|          | <i>Evernia mesomorpha</i>        | N%, C/N |                                   |         |                | Field       | Fort McMurray, Canada | [69]      |
|          | <i>Evernia prunastri</i>         |         | $F_v/F_m$ , Membrane integrity    | DHA     |                | Field       | Italy                 | [93]      |
|          | <i>Flavopunctelia praesignis</i> |         | Chl <i>T</i> , Membrane integrity |         |                | Field       | Morelia, México       | [38]      |

---

|                                 |         |              |                       |             |                             |      |
|---------------------------------|---------|--------------|-----------------------|-------------|-----------------------------|------|
| <i>Hypogymnia physodes</i>      | N%      |              |                       | Field       | British Columbia,<br>Canada | [94] |
| <i>Letharia vulpina</i>         | N%, C/N |              | $\delta^{15}\text{N}$ | Field       | Sierra Nevada, USA          | [95] |
| <i>Melanohalea exasperatula</i> | N%      |              |                       | Field       | Utah and New<br>Mexico, USA | [40] |
| <i>Melanohalea subolivacea</i>  | N%      |              |                       | Field       | Utah and New<br>Mexico, USA | [40] |
| <i>Parmelia sulcata</i>         | N%      |              | $\delta^{15}\text{N}$ | Field       | Germany                     | [63] |
| <i>Parmelia sulcata</i>         | N%      |              |                       | Field       | British Columbia,<br>Canada | [94] |
| <i>Parmotrema hypoleucinum</i>  | N%      |              |                       | Field       | Portugal                    | [96] |
| <i>Phycia adscendens</i>        | N%      |              |                       | Field       | Genoble, France             | [97] |
| <i>Phycia aipolia/stellaris</i> | N%      |              |                       | Field       | Utah and New<br>Mexico, USA | [40] |
| <i>Phycia sp</i>                | N%      |              | $\delta^{15}\text{N}$ | Field       | Germany                     | [63] |
| <i>Platismatia glauca</i>       | N%, N/P | Chl <i>a</i> | $\delta^{15}\text{N}$ | Ctrl. Cond. | Vindeln, Sweden             | [91] |

|            |                              |         |                                                                                             |       |                             |       |
|------------|------------------------------|---------|---------------------------------------------------------------------------------------------|-------|-----------------------------|-------|
|            | <i>Platismatia glauca</i>    | N%      |                                                                                             | Field | British Columbia,<br>Canada | [94]  |
|            | <i>Ramalina ecklonii</i>     | Protein | Chl <i>T</i> , Chl <i>a/b</i> ,<br>Pheophytine <i>a</i> , Pheop.<br><i>a</i> / Chl <i>a</i> | Field | Cordoba, Argentina          | [98]  |
|            | <i>Usnea ceratina</i>        |         | Chl <i>T</i> , Bleaching,<br>Necrosis                                                       | Field | Morelia, México             | [38]  |
|            | <i>Usnea lapponica/hirta</i> | N%      |                                                                                             | Field | Utah and New<br>Mexico, USA | [40]  |
|            | <i>Xanthomendoza montana</i> | N%      |                                                                                             | Field | Utah and New<br>Mexico, USA | [40]  |
|            | <i>Xanthoria parietina</i>   | N%      | $\delta^{15}\text{N}$                                                                       | Field | Germany                     | [99]  |
|            | <i>Xanthoria parietina</i>   | N%      | $\delta^{15}\text{N}$                                                                       | Field | Germany                     | [63]  |
|            | <i>Xanthoria parietina</i>   | N%      |                                                                                             | Field | Portugal                    | [96]  |
| Bryophytes | <i>Abietinella abietina</i>  | N%      | $\delta^{15}\text{N}$                                                                       | Field | Austria                     | [43]  |
|            | <i>Abietinella abietina</i>  | N%      |                                                                                             | Field | Sites of Europe             | [100] |
|            | <i>Abietinella abietina</i>  | N%      |                                                                                             | Field | Sites of Europe             | [101] |

|                                |                               |         |                       |                         |                  |       |
|--------------------------------|-------------------------------|---------|-----------------------|-------------------------|------------------|-------|
| <i>Brachythecium</i>           | N%                            |         | Field                 | Sites of Europe         | [101]            |       |
| <i>Brachythecium rutabulum</i> | N%                            |         | Field                 | Sites of Europe         | [101]            |       |
| <i>Braunia secunda</i>         |                               | NR, PME | Ctrl. Cond.           | Valley of Mexico        | [87]             |       |
| <i>Braunia secunda</i>         | N%, N/P,<br>Sclerophyll index | NR, PME | Ctrl. Cond.           | Morelia, México         | [48]             |       |
| <i>Bryum argenteum</i>         | N%                            |         | Field                 | Sicily, Italy.          | [102]            |       |
| <i>Bryum argenteum</i>         | N%                            |         | Field                 | London, UK              | [103]            |       |
| <i>Bryum capillare</i>         | N%                            |         | Field                 | London, UK              | [103]            |       |
| <i>Ceratodon purpureus</i>     | N%                            |         | Field                 | London, UK              | [103]            |       |
| <i>Dicranum</i>                | N%                            |         | Field                 | Sites of Europe         | [101]            |       |
| <i>Dicranum scoparium</i>      | N%                            | NR      | Ctrl. Cond.           | Ny-Ålesund,<br>Svalbard | [104]            |       |
| <i>Diplophyllum albicans</i>   | N%                            |         | $\delta^{15}\text{N}$ | Field                   | Navarra, Spain   | [105] |
| <i>Fabronia sp</i>             | N%, C/N                       |         | $\delta^{15}\text{N}$ | Field                   | Valley of Mexico | [92]  |

---

|                                  |         |                       |       |                      |       |
|----------------------------------|---------|-----------------------|-------|----------------------|-------|
| <i>Grimmia pulvinata</i>         | N%      | $\delta^{15}\text{N}$ | Field | London, UK           | [103] |
| <i>Grimmia sp</i>                | N%, C/N | $\delta^{15}\text{N}$ | Field | Valley of Mexico     | [92]  |
| <i>Haplocladium microphyllum</i> | N%      | $\delta^{15}\text{N}$ | Field | Southern China       | [42]  |
| <i>Homalothecium</i>             | N%      |                       | Field | Sites of Europe      | [101] |
| <i>Homalothecium lutescens</i>   | N%      | $\delta^{15}\text{N}$ | Field | Navarra, Spain       | [105] |
| <i>Homalothecium sericeum</i>    | N%      | $\delta^{15}\text{N}$ | Field | London, UK           | [103] |
| <i>Hylocomium splendens</i>      | N%      |                       | Field | Sites of Europe      | [106] |
| <i>Hylocomium splendens</i>      | N%      |                       | Field | Sites of Europe      | [44]  |
| <i>Hylocomium splendens</i>      | N%      |                       | Field | Scotland and England | [107] |
| <i>Hylocomium splendens</i>      | N%      |                       | Field | Sites of Europe      | [100] |
| <i>Hylocomium splendens</i>      | N%      |                       | Field | Sites of Europe      | [101] |

|                             |                          |                                                   |                       |                       |                          |                         |
|-----------------------------|--------------------------|---------------------------------------------------|-----------------------|-----------------------|--------------------------|-------------------------|
| <i>Hylocomium splendens</i> | N%                       |                                                   | $\delta^{15}\text{N}$ | Field                 | Southern China           | [42]                    |
| <i>Hylocomium splendens</i> | N%                       |                                                   | $\delta^{15}\text{N}$ | Field                 | Austria                  | [43]                    |
| <i>Hypnum cupressiforme</i> | N%                       |                                                   | $\delta^{15}\text{N}$ | Field                 | Austria                  | [43]                    |
| <i>Hypnum cupressiforme</i> | N%                       |                                                   | $\delta^{15}\text{N}$ | Field                 | Germany                  | [63]                    |
| <i>Hypnum cupressiforme</i> | N%                       |                                                   | $\delta^{15}\text{N}$ | Field                 | Navarra, Spain           | [105]                   |
| <i>Hypnum cupressiforme</i> | N%                       |                                                   |                       | Field                 | Navarra, Spain           | [108]                   |
| <i>Hypnum cupressiforme</i> | N%                       |                                                   |                       | Field                 | Basque Country,<br>Spain | [109]                   |
| <i>Hypnum cupressiforme</i> | N%                       |                                                   |                       | Field                 | Sites of Europe          | [106]                   |
| <i>Hypnum cupressiforme</i> | N%                       |                                                   |                       | Field                 | Sites of Europe          | [44]                    |
| <i>Hypnum cupressiforme</i> | N%                       |                                                   | $\delta^{15}\text{N}$ | Field                 | Navarra, Spain           | [110]                   |
| <i>Hypnum cupressiforme</i> | N%, C/N, N/P,<br>protein | Chl <i>T</i> , Chl <i>a/b</i> ,<br>Carotenes, MDA | SOD, NR, PME          | $\delta^{15}\text{N}$ | Field                    | Navarra, Spain<br>[111] |



|                                  |    |         |                       |                          |                |       |
|----------------------------------|----|---------|-----------------------|--------------------------|----------------|-------|
| <i>Hypnum cupressiforme</i>      | N% |         | Field                 | Alpes                    | [112]          |       |
| <i>Hypnum cupressiforme</i>      | N% |         | Field                 | Sites of Europe          | [100]          |       |
| <i>Hypnum cupressiforme</i>      | N% |         | Field                 | London, UK               | [103]          |       |
| <i>Hypnum cupressiforme</i>      | N% |         | Field                 | Sites of Europe          | [101]          |       |
| <i>Isothecium myosuroides</i>    | N% |         | Field                 | British Columbia, Canada | [94]           |       |
| <i>Leptodontium pungens</i>      |    | NR, PME | Ctrl. Cond.           | Valley of Mexico         | [87]           |       |
| <i>Leucobryum junipe-roideum</i> | N% |         | $\delta^{15}\text{N}$ | Field                    | Navarra, Spain | [105] |
| <i>Pleurochaete squarrosa</i>    | N% |         | $\delta^{15}\text{N}$ | Field                    | Navarra, Spain | [110] |
| <i>Pleurozium schreberi</i>      | N% |         | $\delta^{15}\text{N}$ | Field                    | Germany        | [63]  |
| <i>Pleurozium schreberi</i>      | N% |         | Field                 | Sites of Europe          | [44]           |       |
| <i>Pleurozium schreberi</i>      | N% |         | Field                 | Sites of Europe          | [100]          |       |

|                                 |                            |                                                                                                                        |         |                       |             |                      |       |
|---------------------------------|----------------------------|------------------------------------------------------------------------------------------------------------------------|---------|-----------------------|-------------|----------------------|-------|
| <i>Pleurozium schreberi</i>     | N%                         |                                                                                                                        |         |                       | Field       | Sites of Europe      | [101] |
| <i>Pleurozium schreberi</i>     | N%                         |                                                                                                                        |         | $\delta^{15}\text{N}$ | Field       | Southern China       | [42]  |
| <i>Pleurozium schreberi</i>     | N%                         |                                                                                                                        |         |                       | Field       | Sites of Europe      | [106] |
| <i>Pleurozium schreberi</i>     | N%                         |                                                                                                                        |         |                       | Field       | Alpes                | [112] |
| <i>Pleuroziumschreberi</i>      | N%                         |                                                                                                                        |         | $\delta^{15}\text{N}$ | Field       | Austria              | [43]  |
| <i>Polytrichastrum formosum</i> | N%                         |                                                                                                                        |         | $\delta^{15}\text{N}$ | Field       | Navarra, Spain       | [105] |
| <i>Polytrichum juniperinum</i>  | N%                         |                                                                                                                        | NR      |                       | Ctrl. Cond. | Ny-Ålesund, Svalbard | [104] |
| <i>Pseudoscleropodium purum</i> | N%, N/P, Sclerophyll index | Chl <i>T</i> , Chl <i>a/b</i> , Neo+Lut/B-Car, $F_v/F_m$ , $\phi_{\text{PSII}}$ , $\text{NQP}_{\text{max}}$ , <i>K</i> | NR, PME |                       | Ctrl. Cond. | Derbyshire Dales, UK | [79]  |
| <i>Pseudoscleropodium purum</i> | N%                         |                                                                                                                        |         | $\delta^{15}\text{N}$ | Field       | Germany              | [63]  |
| <i>Pseudoscleropodium purum</i> | N%                         |                                                                                                                        |         |                       | Field       | Sites of Europe      | [106] |
| <i>Pseudoscleropodium purum</i> | N%                         |                                                                                                                        |         |                       | Field       | Sites of Europe      | [44]  |

|                                   |                               |                                                                                                                       |         |                       |             |                             |       |
|-----------------------------------|-------------------------------|-----------------------------------------------------------------------------------------------------------------------|---------|-----------------------|-------------|-----------------------------|-------|
| <i>Pseudoscleropodium purum</i>   | N%                            |                                                                                                                       |         |                       | Field       | Sites of Europe             | [100] |
| <i>Pseudoscleropodium purum</i>   | N%                            |                                                                                                                       |         |                       | Field       | Sites of Europe             | [101] |
| <i>Pseudoscleropodium purum</i>   | N%                            |                                                                                                                       | NR, PME | $\delta^{15}\text{N}$ | Field       | Galicia and Cataluña, Spain | [113] |
| <i>Racomitrium lanuginosum</i>    | N%                            |                                                                                                                       |         |                       | Field       | London, UK                  | [103] |
| <i>Racomitrium lanuginosum</i>    |                               | K                                                                                                                     | NR      |                       | Ctrl. Cond. | Glas Maol, scocia           | [86]  |
| <i>Rhytidiadelphus loreus</i>     | N%                            |                                                                                                                       |         | $\delta^{15}\text{N}$ | Field       | Navarra, Spain              | [105] |
| <i>Rhytidiadelphus squarrosus</i> | N%, N/P,<br>Sclerophyll index | Chl <i>T</i> , Chl <i>a/b</i> ,<br>Neo+Lut/B-Car, $F_v/F_m$ ,<br>$\Phi_{\text{PSII}}$ , $\text{NQP}_{\text{max}}$ , K | NR, PME |                       | Ctrl. Cond. | Derbyshire Dales, UK        | [79]  |
| <i>Rhytidiadelphus squarrosus</i> | N%                            |                                                                                                                       |         |                       | Field       | Sites of Europe             | [101] |
| <i>Scleropodium purum</i>         | N%                            |                                                                                                                       |         | $\delta^{15}\text{N}$ | Field       | Austria                     | [43]  |
| <i>Scleropodium purum</i>         | N%                            |                                                                                                                       |         |                       | Field       | Sites of Europe             | [101] |

|                       |                               |                               |                       |             |                            |       |
|-----------------------|-------------------------------|-------------------------------|-----------------------|-------------|----------------------------|-------|
|                       | <i>Sphagnum capillifolium</i> | N%, C/N                       |                       | Field       | Fort McMurray,<br>Canada   | [69]  |
|                       | <i>Sphagnum fuscum</i>        | N%, C/N                       |                       | Field       | Fort McMurray,<br>Canada   | [69]  |
|                       | <i>Thuidium abietinum</i>     | N%                            |                       | Field       | Sites of Europe            | [101] |
|                       | <i>Thuidium delicatulum</i>   | N%, N/P,<br>Sclerophyll index | NR, PME               | Ctrl. Cond. | Morelia, México            | [48]  |
|                       | <i>Thuidium tamariscinum</i>  | N%                            |                       | Field       | Sites of Europe            | [100] |
|                       | <i>Thuidium tamariscinum</i>  | N%                            |                       | Field       | Sites of Europe            | [101] |
|                       | <i>Tortula muralis</i>        | N%                            | $\delta^{15}\text{N}$ | Field       | Italy                      | [114] |
|                       | <i>Tortula muralis</i>        | N%                            | $\delta^{15}\text{N}$ | Field       | London, UK                 | [103] |
| Vascular<br>epiphytes | <i>Acianthera casapensis</i>  | N%, C/N                       | $\delta^{15}\text{N}$ | Field       | Facatativá, Colombia       | [51]  |
|                       | <i>Aechmea pectinata</i>      |                               | $\delta^{15}\text{N}$ | Field       | São Paulo State,<br>Brazil | [49]  |
|                       | <i>Aechmea sp</i>             |                               | $\delta^{15}\text{N}$ | Field       | São Paulo State,<br>Brazil | [49]  |

---

|                                   |         |                       |       |                            |      |
|-----------------------------------|---------|-----------------------|-------|----------------------------|------|
| <i>Anthurium hoehnei</i>          |         | $\delta^{15}\text{N}$ | Field | São Paulo State,<br>Brazil | [49] |
| <i>Anthurium longicusspidatum</i> |         | $\delta^{15}\text{N}$ | Field | São Paulo State,<br>Brazil | [49] |
| <i>Anthurium mareense</i>         |         | $\delta^{15}\text{N}$ | Field | São Paulo State,<br>Brazil | [49] |
| <i>Begonia sp</i>                 |         | $\delta^{15}\text{N}$ | Field | São Paulo State,<br>Brazil | [49] |
| <i>Billbergia cf. distachia</i>   |         | $\delta^{15}\text{N}$ | Field | São Paulo State,<br>Brazil | [49] |
| <i>Billbergia sp</i>              |         | $\delta^{15}\text{N}$ | Field | São Paulo State,<br>Brazil | [49] |
| <i>Cyrtochilum annulare</i>       | N%, C/N | $\delta^{15}\text{N}$ | Field | Facatativá, Colombia       | [51] |
| <i>Epidendrum excisum</i>         | N%, C/N | $\delta^{15}\text{N}$ | Field | Facatativá, Colombia       | [51] |
| <i>Epidendrum ferrugineum</i>     | N%, C/N | $\delta^{15}\text{N}$ | Field | Facatativá, Colombia       | [51] |
| <i>Epidendrum karstenii</i>       | N%, C/N | $\delta^{15}\text{N}$ | Field | Facatativá, Colombia       | [51] |
| <i>Epidendrum moritzii</i>        | N%, C/N | $\delta^{15}\text{N}$ | Field | Facatativá, Colombia       | [51] |

---

|                                      |         |                       |       |                            |      |
|--------------------------------------|---------|-----------------------|-------|----------------------------|------|
| <i>Epidendrum sp. 1</i>              | N%, C/N | $\delta^{15}\text{N}$ | Field | Facatativá, Colombia       | [51] |
| <i>Epidendrum sp. 2</i>              | N%, C/N | $\delta^{15}\text{N}$ | Field | Facatativá, Colombia       | [51] |
| <i>Epidendrum sp. 4</i>              | N%, C/N | $\delta^{15}\text{N}$ | Field | Facatativá, Colombia       | [51] |
| <i>Epiphyllum sp</i>                 |         | $\delta^{15}\text{N}$ | Field | São Paulo State,<br>Brazil | [49] |
| <i>Fern sp 1</i>                     |         | $\delta^{15}\text{N}$ | Field | São Paulo State,<br>Brazil | [49] |
| <i>Fern sp 2</i>                     |         | $\delta^{15}\text{N}$ | Field | São Paulo State,<br>Brazil | [49] |
| <i>Fern sp 3</i>                     |         | $\delta^{15}\text{N}$ | Field | São Paulo State,<br>Brazil | [49] |
| <i>Hofmeisterella eumicroscopica</i> | N%, C/N | $\delta^{15}\text{N}$ | Field | Facatativá, Colombia       | [51] |
| <i>Lepanthes sp.</i>                 | N%, C/N | $\delta^{15}\text{N}$ | Field | Facatativá, Colombia       | [51] |
| <i>Masdevallia strumifera</i>        | N%, C/N | $\delta^{15}\text{N}$ | Field | Facatativá, Colombia       | [51] |
| <i>Maxillaria spilotantha</i>        | N%, C/N | $\delta^{15}\text{N}$ | Field | Facatativá, Colombia       | [51] |

---

|                                  |         |                       |       |                            |      |
|----------------------------------|---------|-----------------------|-------|----------------------------|------|
| <i>Monstera sp</i>               |         | $\delta^{15}\text{N}$ | Field | São Paulo State,<br>Brazil | [49] |
| <i>Oncidium cultratum</i>        | N%, C/N | $\delta^{15}\text{N}$ | Field | Facatativá, Colombia       | [51] |
| <i>Oncidium ornithorhyncum</i>   | N%, C/N | $\delta^{15}\text{N}$ | Field | Facatativá, Colombia       | [51] |
| <i>Ornithidium aggregatum</i>    | N%, C/N | $\delta^{15}\text{N}$ | Field | Facatativá, Colombia       | [51] |
| <i>Ornithidium aureum</i>        | N%, C/N | $\delta^{15}\text{N}$ | Field | Facatativá, Colombia       | [51] |
| <i>Philodendron sonderianum</i>  |         | $\delta^{15}\text{N}$ | Field | São Paulo State,<br>Brazil | [49] |
| <i>Philodendron sp 1</i>         |         | $\delta^{15}\text{N}$ | Field | São Paulo State,<br>Brazil | [49] |
| <i>Philodendron sp 2</i>         |         | $\delta^{15}\text{N}$ | Field | São Paulo State,<br>Brazil | [49] |
| <i>Philodendron sp 3</i>         |         | $\delta^{15}\text{N}$ | Field | São Paulo State,<br>Brazil | [49] |
| <i>Pleurothallis microcardia</i> | N%, C/N | $\delta^{15}\text{N}$ | Field | Facatativá, Colombia       | [51] |
| <i>Pleurothallis ramulosa</i>    | N%, C/N | $\delta^{15}\text{N}$ | Field | Facatativá, Colombia       | [51] |

---

|                                 |         |                       |       |                            |      |
|---------------------------------|---------|-----------------------|-------|----------------------------|------|
| <i>Pleurothallis talpinaria</i> | N%, C/N | $\delta^{15}\text{N}$ | Field | Facatativá, Colombia       | [51] |
| <i>Restrepiopsis powersii</i>   | N%, C/N | $\delta^{15}\text{N}$ | Field | Facatativá, Colombia       | [51] |
| <i>Rhipsalis sp 1</i>           |         | $\delta^{15}\text{N}$ | Field | São Paulo State,<br>Brazil | [49] |
| <i>Rhipsalis sp 2</i>           |         | $\delta^{15}\text{N}$ | Field | São Paulo State,<br>Brazil | [49] |
| <i>Specklinia sp.</i>           | N%, C/N | $\delta^{15}\text{N}$ | Field | Facatativá, Colombia       | [51] |
| <i>Stelis galeata</i>           | N%, C/N | $\delta^{15}\text{N}$ | Field | Facatativá, Colombia       | [51] |
| <i>Stellis eublepharis</i>      | N%, C/N | $\delta^{15}\text{N}$ | Field | Facatativá, Colombia       | [51] |
| <i>Stellis sp. 2</i>            | N%, C/N | $\delta^{15}\text{N}$ | Field | Facatativá, Colombia       | [51] |
| <i>Stellis sp. 3</i>            | N%, C/N | $\delta^{15}\text{N}$ | Field | Facatativá, Colombia       | [51] |
| <i>Telipogon andicola</i>       | N%, C/N | $\delta^{15}\text{N}$ | Field | Facatativá, Colombia       | [51] |
| <i>Telipogon nervosus</i>       | N%, C/N | $\delta^{15}\text{N}$ | Field | Facatativá, Colombia       | [51] |



|                                   |                                                                                                          |                    |                       |             |                            |       |
|-----------------------------------|----------------------------------------------------------------------------------------------------------|--------------------|-----------------------|-------------|----------------------------|-------|
| <i>Tillandsia recurvata</i>       | N%, C/N                                                                                                  |                    | $\delta^{15}\text{N}$ | Field       | Valley of Mexico           | [92]  |
| <i>Tillandsia recurvata</i>       | N%, N/P,<br>Sclerophyll index                                                                            | NR, PME            |                       | Ctrl. Cond. | Morelia, México            | [48]  |
| <i>Tillandsia recurvata</i>       | Dry/fresh weight,<br>Leaf area, Specific<br>area foliar,<br>Sclerophyll index,<br>Thickness<br>epidermis | Chl <i>T</i>       |                       | Field       | Curitiba, Brazil,          | [115] |
| <i>Tillandsia usneoides</i>       |                                                                                                          | Anomalous scales % |                       | Field       | São Paulo State,<br>Brazil | [116] |
| <i>Tillandsia usneoides</i>       | N%, N/P,<br>Sclerophyll index                                                                            | NR, PME            |                       | Ctrl. Cond. | Morelia, México            | [48]  |
| <i>Tillandsia usneoides</i>       | N%                                                                                                       |                    | $\delta^{15}\text{N}$ | Field       | Wilmington, USA            | [78]  |
| <i>Trichipteris corcovadensis</i> |                                                                                                          |                    | $\delta^{15}\text{N}$ | Field       | São Paulo State,<br>Brazil | [49]  |
| <i>Vriesia inflata</i>            |                                                                                                          |                    | $\delta^{15}\text{N}$ | Field       | São Paulo State,<br>Brazil | [49]  |
| <i>Vriesia philippocobrugii</i>   |                                                                                                          |                    | $\delta^{15}\text{N}$ | Field       | São Paulo State,<br>Brazil | [49]  |

|       |                           |                     |                                           |    |                       |             |                           |      |
|-------|---------------------------|---------------------|-------------------------------------------|----|-----------------------|-------------|---------------------------|------|
| Herbs | <i>Agrostis perennans</i> | C:N                 |                                           |    | $\delta^{15}\text{N}$ | Field       | Pennsylvania, USA         | [56] |
|       | <i>Avena fatua</i>        | N%, C/N             |                                           |    | $\delta^{15}\text{N}$ | Field       | Los Angeles Basin, USA    | [55] |
|       | <i>Bidens pilosa</i>      | Dry weight, N%, C/N | Chl <i>T</i> , Chl <i>a/b</i> , $F_v/F_m$ | NR | $\delta^{15}\text{N}$ | Ctrl. Cond. | Morelia, México           | [58] |
|       | <i>Bidens pilosa</i>      |                     |                                           |    | $\delta^{15}\text{N}$ | Field       | São Paulo State, Brazil   | [49] |
|       | <i>Bromus diandrus</i>    | N%, C/N             |                                           |    | $\delta^{15}\text{N}$ | Field       | Los Angeles Basin, USA    | [55] |
|       | <i>Bromus hordeaceus</i>  | N%, C/N             |                                           |    | $\delta^{15}\text{N}$ | Field       | Los Angeles Basin, USA    | [55] |
|       | <i>Bromus madritensis</i> | N%, C/N             |                                           |    | $\delta^{15}\text{N}$ | Field       | Los Angeles Basin, USA    | [55] |
|       | <i>Cenchrus ciliaris</i>  | N%, C/N             |                                           |    | $\delta^{15}\text{N}$ | Field       | Sonora, México            | [60] |
|       | <i>Cenchrus ciliaris</i>  | N%                  |                                           |    |                       | Field       | Punjab province, Pakistan | [59] |
|       | <i>Chloris gayana</i>     | Dry weight, N%, C/N | Chl <i>T</i> , Chl <i>a/b</i> , $F_v/F_m$ | NR | $\delta^{15}\text{N}$ | Ctrl. Cond. | Morelia, México           | [58] |
|       | <i>Chloris pycnотryx</i>  | Dry weight, N%, C/N | Chl <i>T</i> , Chl <i>a/b</i> , $F_v/F_m$ | NR | $\delta^{15}\text{N}$ | Ctrl. Cond. | Morelia, México           | [58] |

---

|                                 |                        |                                                                             |    |                       |             |                              |       |
|---------------------------------|------------------------|-----------------------------------------------------------------------------|----|-----------------------|-------------|------------------------------|-------|
| <i>Chloris virgata</i>          | Dry weight, N%,<br>C/N | Chl <i>T</i> , Chl <i>a/b</i> , <i>F<sub>v</sub></i> / <i>F<sub>m</sub></i> | NR | $\delta^{15}\text{N}$ | Ctrl. Cond. | Morelia, México              | [58]  |
| <i>Costus arabicus</i>          |                        |                                                                             |    | $\delta^{15}\text{N}$ | Field       | São Paulo State,<br>Brazil   | [49]  |
| <i>Cyclopogon peruvianus</i>    | N%, C/N                |                                                                             |    | $\delta^{15}\text{N}$ | Field       | Facatativá, Colombia         | [51]  |
| <i>Cyrtochilum revolutum</i>    | N%, C/N                |                                                                             |    | $\delta^{15}\text{N}$ | Field       | Facatativá, Colombia         | [51]  |
| <i>Datura alba</i>              | N%                     |                                                                             |    |                       | Field       | Punjab province,<br>Pakistan | [59]  |
| <i>Deschampsia flexuosa</i>     | N%                     |                                                                             |    |                       | Field       | Scotland and England         | [107] |
| <i>Elleanthus aurantiacus</i>   | N%, C/N                |                                                                             |    | $\delta^{15}\text{N}$ | Field       | Facatativá, Colombia         | [51]  |
| <i>Epidendrum macrostachyum</i> | N%, C/N                |                                                                             |    | $\delta^{15}\text{N}$ | Field       | Facatativá, Colombia         | [51]  |
| <i>Epidendrum megalospathum</i> | N%, C/N                |                                                                             |    | $\delta^{15}\text{N}$ | Field       | Facatativá, Colombia         | [51]  |
| <i>Epidendrum secundum</i>      | N%, C/N                |                                                                             |    | $\delta^{15}\text{N}$ | Field       | Facatativá, Colombia         | [51]  |
| <i>Epidendrum sp. 3</i>         | N%, C/N                |                                                                             |    | $\delta^{15}\text{N}$ | Field       | Facatativá, Colombia         | [51]  |

|                                |                        |                                           |    |                       |             |                            |       |
|--------------------------------|------------------------|-------------------------------------------|----|-----------------------|-------------|----------------------------|-------|
| <i>Epidendrum zipaquiranum</i> | N%, C/N                |                                           |    | $\delta^{15}\text{N}$ | Field       | Facatativá, Colombia       | [51]  |
| <i>Hordeum vulgate</i>         | N%                     |                                           |    |                       | Field       | The Netherlands            | [73]  |
| <i>Impatiens sp</i>            |                        |                                           |    | $\delta^{15}\text{N}$ | Field       | São Paulo State,<br>Brazil | [49]  |
| <i>Lepidium virginicum</i>     | Dry weight, N%,<br>C/N | Chl <i>T</i> , Chl <i>a/b</i> , $F_v/F_m$ | NR | $\delta^{15}\text{N}$ | Ctrl. Cond. | Morelia, México            | [58]  |
| <i>Lolium multiflorum</i>      |                        |                                           |    | $\delta^{15}\text{N}$ | Field       | Denmark                    | [117] |
| <i>Maianthemum trifolium</i>   | N%, C/N                |                                           |    |                       | Field       | Fort McMurray,<br>Canada   | [69]  |
| <i>Masdevallia amanda</i>      | N%, C/N                |                                           |    | $\delta^{15}\text{N}$ | Field       | Facatativá, Colombia       | [51]  |
| <i>Masdevallia coriacea</i>    | N%, C/N                |                                           |    | $\delta^{15}\text{N}$ | Field       | Facatativá, Colombia       | [51]  |
| <i>Maxillaria lawrenceana</i>  | N%, C/N                |                                           |    | $\delta^{15}\text{N}$ | Field       | Facatativá, Colombia       | [51]  |
| <i>Nardus stricta</i>          | N%                     |                                           |    |                       | Field       | Scotland and England       | [107] |
| <i>Panicum virgatum</i>        | C/N                    |                                           |    | $\delta^{15}\text{N}$ | Field       | Pennsylvania, USA          | [56]  |

---

|                                   |                        |                                                                             |    |                       |             |       |                              |      |
|-----------------------------------|------------------------|-----------------------------------------------------------------------------|----|-----------------------|-------------|-------|------------------------------|------|
| <i>Parthenium hysterophorus</i>   | N%                     |                                                                             |    |                       |             | Field | Punjab province,<br>Pakistan | [59] |
| <i>Pennisetum setaceum</i>        | Dry weight, N%,<br>C/N | Chl <i>T</i> , Chl <i>a/b</i> , <i>F<sub>v</sub></i> / <i>F<sub>m</sub></i> | NR | $\delta^{15}\text{N}$ | Ctrl. Cond. |       | Morelia, México              | [58] |
| <i>Piper cernuum</i>              |                        |                                                                             |    | $\delta^{15}\text{N}$ | Field       |       | São Paulo State,<br>Brazil   | [49] |
| <i>Pleurothallis killipii</i>     | N%, C/N                |                                                                             |    | $\delta^{15}\text{N}$ | Field       |       | Facatativá, Colombia         | [51] |
| <i>Pleurothallis phalangifera</i> | N%, C/N                |                                                                             |    | $\delta^{15}\text{N}$ | Field       |       | Facatativá, Colombia         | [51] |
| <i>Pleurothallis revoluta</i>     | N%, C/N                |                                                                             |    | $\delta^{15}\text{N}$ | Field       |       | Facatativá, Colombia         | [51] |
| <i>Prescottia stachyodes</i>      | N%, C/N                |                                                                             |    | $\delta^{15}\text{N}$ | Field       |       | Facatativá, Colombia         | [51] |
| <i>Rubus chamaemorus</i>          | N%, C/N                |                                                                             |    |                       | Field       |       | Fort McMurray,<br>Canada     | [69] |
| <i>Stelis argentata</i>           | N%, C/N                |                                                                             |    | $\delta^{15}\text{N}$ | Field       |       | Facatativá, Colombia         | [51] |
| <i>Stellis sp. 1</i>              | N%, C/N                |                                                                             |    | $\delta^{15}\text{N}$ | Field       |       | Facatativá, Colombia         | [51] |

---

|                  |                                 |                        |                                           |    |                       |             |                            |      |
|------------------|---------------------------------|------------------------|-------------------------------------------|----|-----------------------|-------------|----------------------------|------|
|                  | <i>Stenorrhynchos speciosum</i> | N%, C/N                |                                           |    | $\delta^{15}\text{N}$ | Field       | Facatativá, Colombia       | [51] |
|                  | <i>Taraxacum officinale</i>     | Dry weight, N%,<br>C/N | Chl <i>T</i> , Chl <i>a/b</i> , $F_v/F_m$ | NR | $\delta^{15}\text{N}$ | Ctrl. Cond. | Morelia, México            | [58] |
|                  | <i>Wedelia trilobata</i>        |                        |                                           |    | $\delta^{15}\text{N}$ | Field       | São Paulo State,<br>Brazil | [49] |
| Woody<br>species | <i>Abies alba</i>               | N%                     |                                           |    | $\delta^{15}\text{N}$ | Field       | Europe                     | [70] |
|                  | <i>Abies balsamea</i>           | N%                     |                                           |    | $\delta^{15}\text{N}$ | Field       | North America              | [70] |
|                  | <i>Acer pensylvanicum</i>       | N%                     |                                           |    | $\delta^{15}\text{N}$ | Field       | North America              | [70] |
|                  | <i>Acer platanoides</i>         | N%                     |                                           |    | $\delta^{15}\text{N}$ | Field       | Germany                    | [63] |
|                  | <i>Acer platanoides</i>         | N%                     |                                           |    | $\delta^{15}\text{N}$ | Field       | Salt Lake Valley, USA      | [64] |
|                  | <i>Acer pseudoplatanus</i>      | N%                     |                                           |    | $\delta^{15}\text{N}$ | Field       | Germany                    | [63] |
|                  | <i>Acer rubrum</i>              | N%                     |                                           |    | $\delta^{15}\text{N}$ | Field       | North America              | [70] |
|                  | <i>Acer saccharum</i>           | N%                     |                                           |    | $\delta^{15}\text{N}$ | Field       | North America              | [70] |

---

|                              |    |                       |       |                      |       |
|------------------------------|----|-----------------------|-------|----------------------|-------|
| <i>Acer spicatum</i>         | N% | $\delta^{15}\text{N}$ | Field | North America        | [70]  |
| <i>Alnus glutinosa</i>       | N% | $\delta^{15}\text{N}$ | Field | Germany              | [63]  |
| <i>Alnus incana</i>          | N% | $\delta^{15}\text{N}$ | Field | Europe               | [70]  |
| <i>Amelanchier laevis</i>    | N% | $\delta^{15}\text{N}$ | Field | Europe               | [70]  |
| <i>Betula alleghaniensis</i> | N% | $\delta^{15}\text{N}$ | Field | North America        | [70]  |
| <i>Betula lenta</i>          | N% | $\delta^{15}\text{N}$ | Field | North America        | [70]  |
| <i>Betula papyrifera</i>     | N% | $\delta^{15}\text{N}$ | Field | North America        | [70]  |
| <i>Betula pendula</i>        | N% | $\delta^{15}\text{N}$ | Field | Europe               | [70]  |
| <i>Betula pendula</i>        | N% | $\delta^{15}\text{N}$ | Field | Germany              | [63]  |
| <i>Betula populifolia</i>    | N% | $\delta^{15}\text{N}$ | Field | North America        | [70]  |
| <i>Calluna vulgaris</i>      | N% |                       | Field | Scotland and England | [107] |

---

|                              |              |                       |       |                             |       |
|------------------------------|--------------|-----------------------|-------|-----------------------------|-------|
| <i>Calluna vulgaris</i>      | N%, C/N, a.a | $\delta^{15}\text{N}$ | Field | London and rural Surrey, UK | [57]  |
| <i>Calotropis procera</i>    | N%           |                       | Field | Punjab province, Pakistan   | [59]  |
| <i>Cariniana ianeirensis</i> | N%           | $\delta^{15}\text{N}$ | Field | Bolivia, Thailand, Cameroon | [62]  |
| <i>Carpinus betula</i>       | N%           | $\delta^{15}\text{N}$ | Field | Europe                      | [70]  |
| <i>Carpinus betulus</i>      | N%           | $\delta^{15}\text{N}$ | Field | Germany                     | [63]  |
| <i>Cecropia sp</i>           |              | $\delta^{15}\text{N}$ | Field | São Paulo State, Brazil     | [49]  |
| <i>Cedrela odorata</i>       | N%           | $\delta^{15}\text{N}$ | Field | Mato Grosso, Brazil         | [107] |
| <i>Chusquea coleu</i>        | N%           | $\delta^{15}\text{N}$ | Field | South America               | [70]  |
| <i>Chusquea quila</i>        | N%           | $\delta^{15}\text{N}$ | Field | South America               | [70]  |
| <i>Cinnamomum camphora</i>   | N%           | $\delta^{15}\text{N}$ | Field | Guiyang, China              | [68]  |



---

|                           |    |              |          |                       |       |                                |       |
|---------------------------|----|--------------|----------|-----------------------|-------|--------------------------------|-------|
| <i>Corylus avellana</i>   | N% |              |          | $\delta^{15}\text{N}$ | Field | Germany                        | [63]  |
| <i>Corylus avellana</i>   | N% |              |          | $\delta^{15}\text{N}$ | Field | Europe                         | [70]  |
| <i>Dalbergia sissoo</i>   |    | Chl <i>T</i> | POD, PPO |                       | Field | Udaipur, India                 | [118] |
| <i>Daniellia ogea</i>     | N% |              |          | $\delta^{15}\text{N}$ | Field | Bolivia, Thailand,<br>Cameroon | [62]  |
| <i>Erica cinerea</i>      | N% |              |          |                       | Field | Scotland and England           | [107] |
| <i>Eriotheca sp</i>       |    |              |          | $\delta^{15}\text{N}$ | Field | São Paulo State,<br>Brazil     | [49]  |
| <i>Fagus grandifolia</i>  | N% |              |          | $\delta^{15}\text{N}$ | Field | North America                  | [70]  |
| <i>Fagus sylvatica</i>    | N% |              |          | $\delta^{15}\text{N}$ | Field | Europe                         | [70]  |
| <i>Ficus sp</i>           |    |              |          | $\delta^{15}\text{N}$ | Field | São Paulo State,<br>Brazil     | [49]  |
| <i>Fraxinus americana</i> | N% |              |          | $\delta^{15}\text{N}$ | Field | North America                  | [70]  |

---

|                                |    |                       |       |                                |      |
|--------------------------------|----|-----------------------|-------|--------------------------------|------|
| <i>Fraxinus excelsior</i>      | N% | $\delta^{15}\text{N}$ | Field | Germany                        | [63] |
| <i>Gleditsia triacanthos</i>   | N% | $\delta^{15}\text{N}$ | Field | Salt Lake Valley, USA          | [64] |
| <i>Hura crepitans</i>          | N% | $\delta^{15}\text{N}$ | Field | Bolivia, Thailand,<br>Cameroon | [62] |
| <i>Juniperus virginiana</i>    | N% | $\delta^{15}\text{N}$ | Field | North America                  | [70] |
| <i>Koelreuteria paniculata</i> | N% | $\delta^{15}\text{N}$ | Field | Salt Lake Valley, USA          | [64] |
| <i>Liriodendron tulipifera</i> | N% | $\delta^{15}\text{N}$ | Field | North America                  | [70] |
| <i>Malus domestica</i>         | N% | $\delta^{15}\text{N}$ | Field | Germany                        | [63] |
| <i>Melia azedarach</i>         | N% | $\delta^{15}\text{N}$ | Field | Bolivia, Thailand,<br>Cameroon | [62] |
| <i>Miconia sp</i>              |    | $\delta^{15}\text{N}$ | Field | São Paulo State,<br>Brazil     | [49] |
| <i>Nothofagus betuloides</i>   | N% | $\delta^{15}\text{N}$ | Field | South America                  | [70] |

---

|                           |    |             |                       |             |                            |       |
|---------------------------|----|-------------|-----------------------|-------------|----------------------------|-------|
| <i>Nothofagus obliqua</i> | N% |             | $\delta^{15}\text{N}$ | Field       | South America              | [70]  |
| <i>Ostrya virginiana</i>  | N% |             | $\delta^{15}\text{N}$ | Field       | North America              | [70]  |
| <i>Persea lingue</i>      | N% |             | $\delta^{15}\text{N}$ | Field       | South America              | [70]  |
| <i>Picea abies</i>        | N% |             | $\delta^{15}\text{N}$ | Field       | Europe                     | [70]  |
| <i>Picea abies</i>        |    |             | $\delta^{15}\text{N}$ | Field       | Switzerland                | [66]  |
| <i>Picea abies</i>        |    |             | $\delta^{15}\text{N}$ | Field       | Fichtelgebirge,<br>Germany | [119] |
| <i>Picea abies</i>        | N% |             | $\delta^{15}\text{N}$ | Field       | Fichtelgebirge,<br>Germany | [120] |
| <i>Picea abies</i>        |    |             | $\delta^{15}\text{N}$ | Field       | Switzerland                | [61]  |
| <i>Picea abies</i>        |    | NR, NiR, GS | $\delta^{15}\text{N}$ | Ctrl. Cond. | Garmisch-<br>Partenkirchen | [121] |
| <i>Picea engelmannii</i>  | N% |             | $\delta^{15}\text{N}$ | Field       | North America              | [70]  |
| <i>Picea glauca</i>       | N% |             | $\delta^{15}\text{N}$ | Field       | North America              | [70]  |

---

|                         |         |                       |       |                          |       |
|-------------------------|---------|-----------------------|-------|--------------------------|-------|
| <i>Picea mariana</i>    | N%      | $\delta^{15}\text{N}$ | Field | North America            | [70]  |
| <i>Picea mariana</i>    | N%, C/N | $\delta^{15}\text{N}$ | Field | Fort McMurray,<br>Canada | [69]  |
| <i>Picea rubens</i>     | N%      | $\delta^{15}\text{N}$ | Field | North America            | [70]  |
| <i>Picea sitchensis</i> | N%      | $\delta^{15}\text{N}$ | Field | Europe                   | [70]  |
| <i>Pinus banksiana</i>  | N%      | $\delta^{15}\text{N}$ | Field | North America            | [70]  |
| <i>Pinus densiflora</i> | N%, C/N | $\delta^{15}\text{N}$ | Field | Korean cities            | [122] |
| <i>Pinus edulis</i>     | N%      | $\delta^{15}\text{N}$ | Field | Grand Canyon, USA        | [67]  |
| <i>Pinus pinaster</i>   | N%      | $\delta^{15}\text{N}$ | Field | Europe                   | [70]  |
| <i>Pinus resinosa</i>   | N%      | $\delta^{15}\text{N}$ | Field | North America            | [70]  |
| <i>Pinus rigida</i>     | N%      | $\delta^{15}\text{N}$ | Field | North America            | [70]  |
| <i>Pinus strobus</i>    | N%      | $\delta^{15}\text{N}$ | Field | North America            | [70]  |

---

|                                |    |                       |       |                           |       |
|--------------------------------|----|-----------------------|-------|---------------------------|-------|
| <i>Pinus sylvestris</i>        | N% | $\delta^{15}\text{N}$ | Field | Germany                   | [63]  |
| <i>Pinus sylvestris</i>        | N% | $\delta^{15}\text{N}$ | Field | Leipzig-Halle,<br>Germany | [123] |
| <i>Pinus sylvestris</i>        | N% | $\delta^{15}\text{N}$ | Field | Europe                    | [70]  |
| <i>Populus canadensis</i>      | N% | $\delta^{15}\text{N}$ | Field | Germany                   | [63]  |
| <i>Populus tremuloides</i>     | N% | $\delta^{15}\text{N}$ | Field | Salt Lake Valley, USA     | [64]  |
| <i>Populus tremuloides</i>     | N% | $\delta^{15}\text{N}$ | Field | North America             | [70]  |
| <i>Prunus avium</i>            | N% | $\delta^{15}\text{N}$ | Field | Germany                   | [63]  |
| <i>Prunus domestica</i>        | N% | $\delta^{15}\text{N}$ | Field | Germany                   | [63]  |
| <i>Prunus serotina</i>         | N% | $\delta^{15}\text{N}$ | Field | North America             | [70]  |
| <i>Pseudotsuga menziesii</i>   | N% | $\delta^{15}\text{N}$ | Field | Europe                    | [70]  |
| <i>Pyrus calleryana</i> Maxim. | N% | $\delta^{15}\text{N}$ | Field | Salt Lake Valley, USA     | [64]  |

---

|                                   |         |                       |       |                              |      |
|-----------------------------------|---------|-----------------------|-------|------------------------------|------|
| <i>Quercus petraea</i>            | N%      | $\delta^{15}\text{N}$ | Field | Germany                      | [63] |
| <i>Quercus robur</i>              | N%      | $\delta^{15}\text{N}$ | Field | Europe                       | [70] |
| <i>Quercus robur</i>              | N%      | $\delta^{15}\text{N}$ | Field | Germany                      | [63] |
| <i>Quercus rubra</i>              | N%      | $\delta^{15}\text{N}$ | Field | Europe                       | [70] |
| <i>Quercus velutina</i>           | N%      | $\delta^{15}\text{N}$ | Field | North America                | [70] |
| <i>Rhododendron groenlandicum</i> | N%, C/N |                       | Field | Fort McMurray,<br>Canada     | [69] |
| <i>Ricinus communis</i>           | N%      |                       | Field | Punjab province,<br>Pakistan | [59] |
| <i>Salix spp.</i>                 | N%      | $\delta^{15}\text{N}$ | Field | Germany                      | [63] |
| <i>Saxegothaea conspicua</i>      | N%      | $\delta^{15}\text{N}$ | Field | South America                | [70] |
| <i>Sorbus americana</i>           | N%      | $\delta^{15}\text{N}$ | Field | North America                | [70] |

---

|                              |    |                       |       |                                |       |
|------------------------------|----|-----------------------|-------|--------------------------------|-------|
| <i>Sorbus torminalis</i>     | N% | $\delta^{15}\text{N}$ | Field | Germany                        | [63]  |
| <i>Swietenia macrophylla</i> | N% | $\delta^{15}\text{N}$ | Field | Mato Grosso, Brazil            | [124] |
| <i>Terminalia ivorensis</i>  | N% | $\delta^{15}\text{N}$ | Field | Bolivia, Thailand,<br>Cameroon | [62]  |
| <i>Thuja occidentalis</i>    | N% | $\delta^{15}\text{N}$ | Field | North America                  | [70]  |
| <i>Tibouchina pulcra</i>     |    | $\delta^{15}\text{N}$ | Field | São Paulo State,<br>Brazil     | [49]  |
| <i>Tilia americana</i>       | N% | $\delta^{15}\text{N}$ | Field | North America                  | [70]  |
| <i>Tilia cordata</i>         | N% | $\delta^{15}\text{N}$ | Field | Germany                        | [63]  |
| <i>Tilia cordata</i>         |    | $\delta^{15}\text{N}$ | Field | Basque Country,<br>Spain       | [26]  |
| <i>Tilia platyphyllos</i>    | N% | $\delta^{15}\text{N}$ | Field | Germany                        | [63]  |
| <i>Toona ciliata</i>         | N% | $\delta^{15}\text{N}$ | Field | Bolivia, Thailand,<br>Cameroon | [62]  |

---

|                             |         |                       |       |                            |      |
|-----------------------------|---------|-----------------------|-------|----------------------------|------|
| <i>Trema micrantha</i>      |         | $\delta^{15}\text{N}$ | Field | São Paulo State,<br>Brazil | [49] |
| <i>Tsuga canadensis</i>     | N%      | $\delta^{15}\text{N}$ | Field | North America              | [70] |
| <i>Vaccinium oxycoccos</i>  | N%, C/N |                       | Field | Fort McMurray,<br>Canada   | [69] |
| <i>Vaccinium vitisidaea</i> | N%, C/N |                       | Field | Fort McMurray,<br>Canada   | [69] |
| <i>Viburnum alnifolium</i>  | N%      | $\delta^{15}\text{N}$ | Field | North America              | [70] |

---
